# Supplementary figures and images for: Correlated structural, vibrational and dielectric properties of the [(C 4 H 9 ) 4 N] 2 CoBr 4 compound: origin of low-frequency polarization
Source: Royal Society of Chemistry journal article supplement (doi:10.1039/d5ra09416j), 2026-01-01

**Figure 1:**

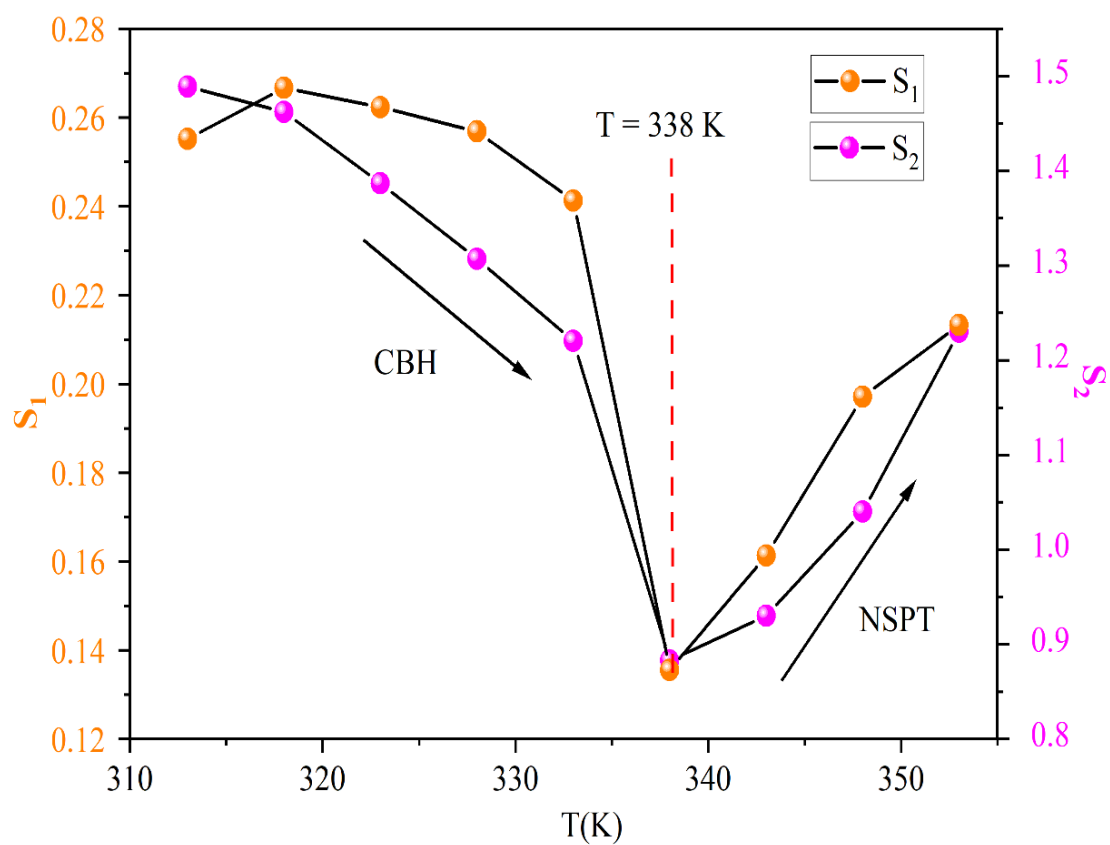

**Figure 2:**

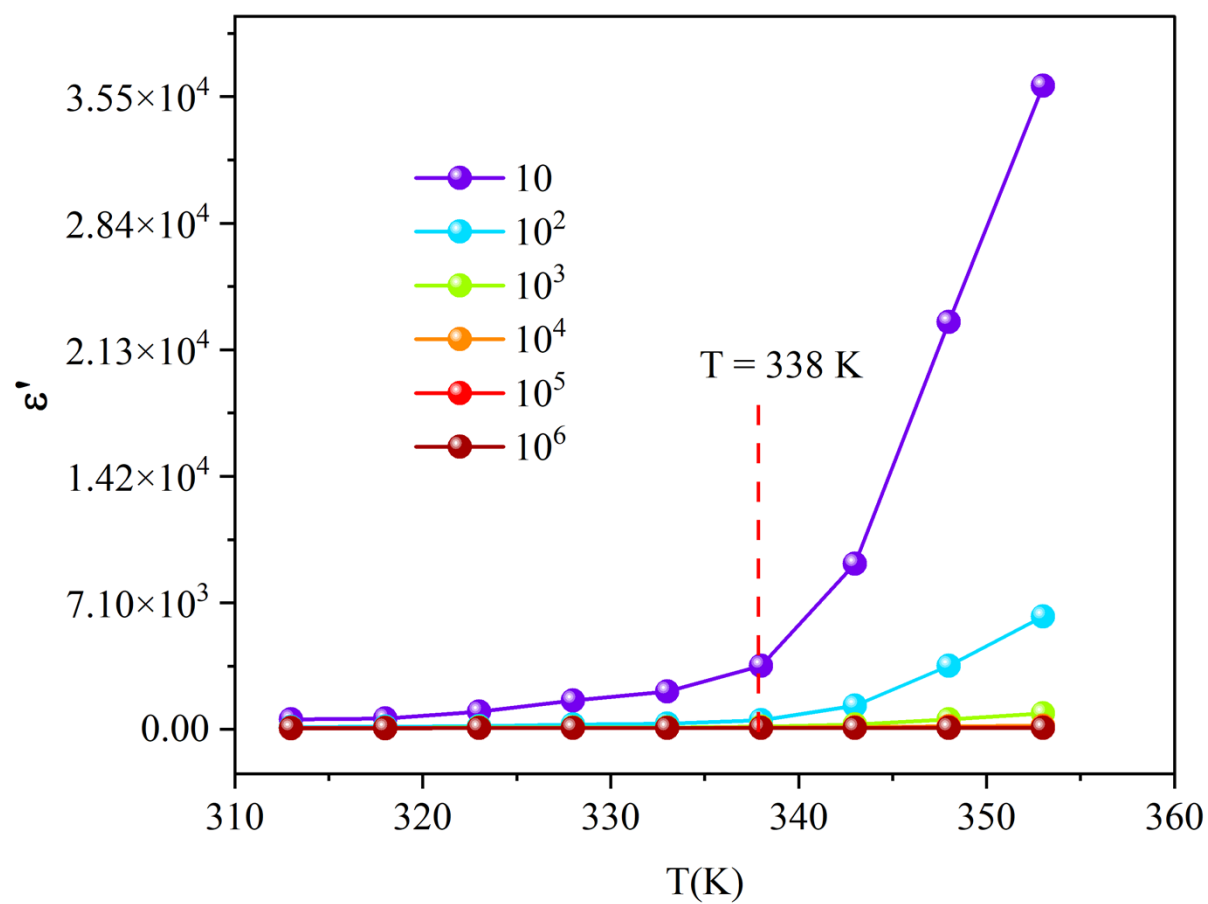

Supplement: d5ra09416j1.pdf [file d5ra09416j1.pdf]
